# Supplementary material for: Near-Infrared Light Irradiation of Porphyrin-Modified Gold Nanoparticles Promotes Cancer-Cell-Specific Cytotoxicity
Source: MDPI journal article supplement (doi:10.3390/molecules27041238), 2022-02-12
Supplement: s1 [file s1]

# Near-Infrared Light Irradiation of Porphyrin Modified Gold Nanoparticles Promotes Cancer Cell Specific Cytotoxicity

Hiromi Kurokawa <sup>1,2,\*</sup>, Atsushi Taninaka <sup>3,4</sup>, Toru Yoshitomi <sup>5</sup>, Hidemi Shigekawa <sup>3</sup> and Hirofumi Matsui <sup>1</sup>

<sup>1</sup> Faculty of Medicine, University of Tsukuba, Ibaraki 305-8573, Japan; hmatsui@md.tsukuba.ac.jp

<sup>2</sup> MoBiol Technologies Corporation, Ibaraki 305-0031, Japan

<sup>3</sup> Faculty of Pure and Applied Sciences, University of Tsukuba, Ibaraki 305-8573, Japan; jun\_t@bk.tsukuba.ac.jp (A.T.); hidemi@bk.tsukuba.ac.jp (H.S.)

<sup>4</sup> TAKANO Co., Ltd., Nagano 399-4301, Japan

<sup>5</sup> Research Center for Functional Materials, National Institute for Materials Science, Ibaraki 305-0044, Japan; YOSHITOMI.Toru@nims.go.jp (T.Y.)

\* Correspondence: hkurokawa.tt@md.tsukuba.ac.jp

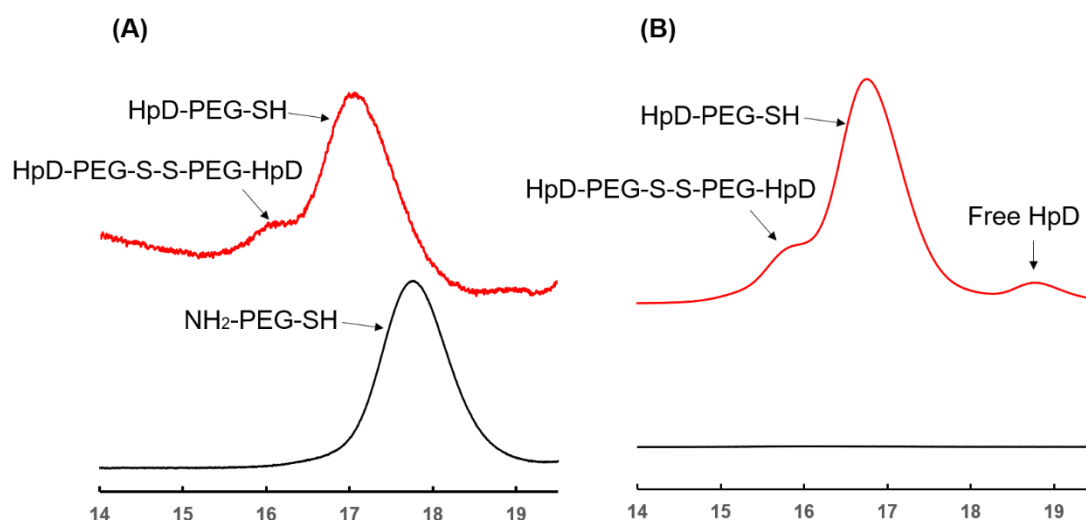

**Figure S1.** Gel permeation chromatograms of (black line) NH<sub>2</sub>-PEG-SH and (red line) HpD-PEG-SH, which were measured by high-performance chromatography connected to a DP-8020 pump (TOSOH, Japan), a CO-8020 column oven (TOSOH, Japan), a UV-8020 ultraviolet detector (TOSOH, Japan), and an RI-2031 refractive index detector (JASCO, Japan) with Shodex OHpak SB-803HQ columns (Showa Denko, Tokyo, Japan). DMF containing 10 mM LiCl was used as the eluent at a flow rate of 0.5 mL/min at 40 °C. (A) The refractive index chromatograms of (black) NH<sub>2</sub>-PEG-SH and (red) HpD-PEG-SH were shown. (B) The ultraviolet chromatograms at 400 nm of (black) NH<sub>2</sub>-PEG-SH and (red) HpD-PEG-SH were shown.

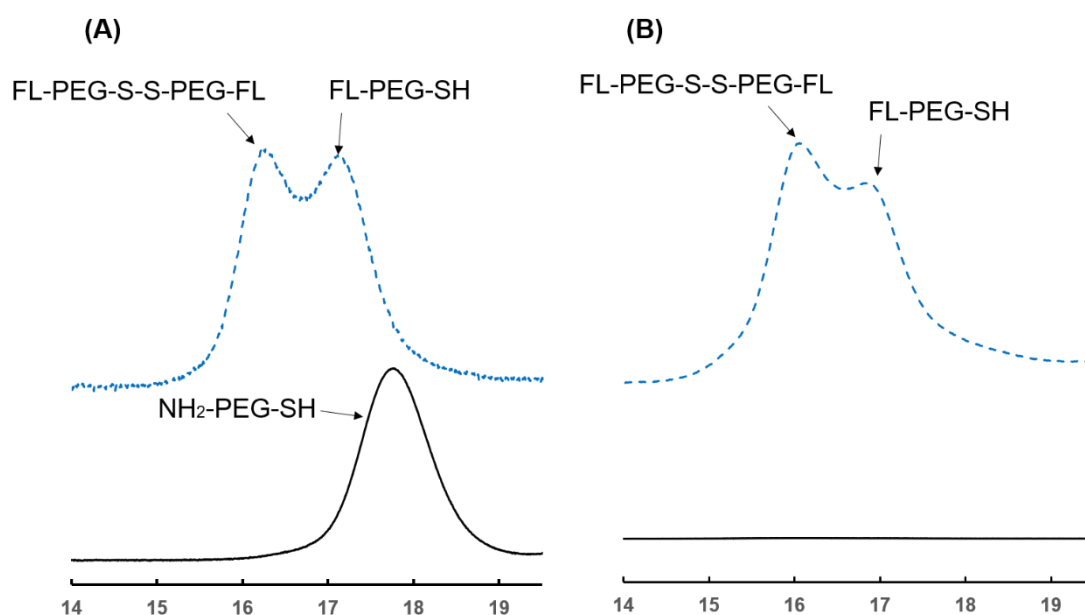

**Figure S2.** Gel permeation chromatograms of (black line) NH<sub>2</sub>-PEG-SH and (blue dot line) FL-PEG-SH, which were measured by high-performance chromatography connected to a DP-8020 pump (TOSOH, Japan), a CO-8020 column oven (TOSOH, Japan), a UV-8020 ultraviolet detector at 480 nm (TOSOH, Japan), and an RI-2031 refractive index detector (JASCO, Japan) with Shodex OHpak SB-803HQ columns (Showa Denko, Tokyo, Japan). DMF containing 10 mM LiCl was used as the eluent at a flow rate of 0.5 mL/min at 40°C. **(A)** The refractive index chromatograms of (black) NH<sub>2</sub>-PEG-SH and (blue) FL-PEG-SH were shown. **(B)** The ultraviolet chromatograms at 400 nm of (black) NH<sub>2</sub>-PEG-SH and (blue) FL-PEG-SH were shown.

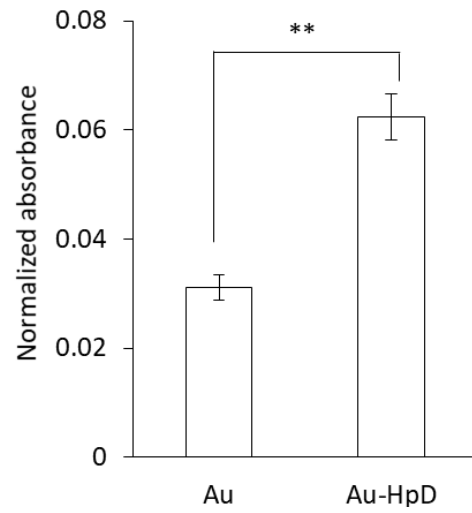

**Figure S3.** Intracellular AuNPs and Au-HpD accumulation in cancer cells. Data are expressed as means  $\pm$  SD ( $n = 5$ ). \*\*  $p < 0.01$ . RGK1 cells were seeded in 12-well plates at a density of  $5 \times 10^4$  cells/well and incubated at 37 °C for 24 h. AuNPs or Au-HpD was added to cells and 24 h after cells were rinsed with phosphate buffer solution (PBS), and lysed in 100  $\mu$ L of RIPA buffer. The cell homogenates were transferred to a 96-well plate and the absorbance was measured at 870 nm using a Synergy H1 microplate reader (BioTek Instruments Inc., Winooski, VT, USA).
